# Supplementary material for: Salicylic acid-primed defence response in octoploid strawberry ‘Benihoppe’ leaves induces resistance against Podosphaera aphanis through enhanced accumulation of proanthocyanidins and upregulation of pathogenesis-related genes
Source: PubMed Central journal article supplement (PMC7140339; doi:10.1186/s12870-020-02353-z), 2020-04-08

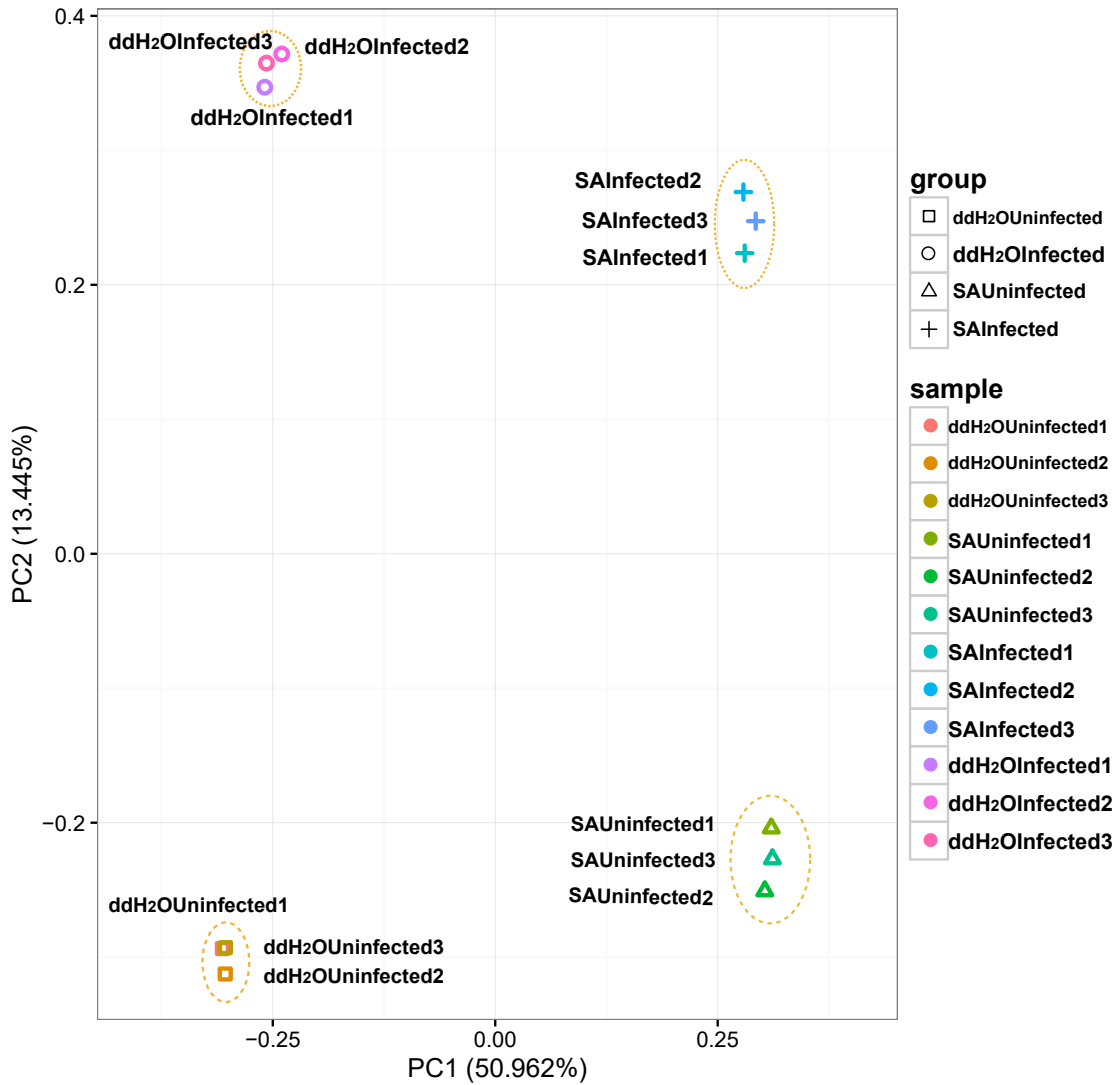

Supplement: 12870_2020_2353_MOESM2_ESM.pdf [file 12870_2020_2353_MOESM2_ESM.pdf]
