# Supplementary material for: Salicylic acid-primed defence response in octoploid strawberry ‘Benihoppe’ leaves induces resistance against Podosphaera aphanis through enhanced accumulation of proanthocyanidins and upregulation of pathogenesis-related genes
Source: PubMed Central journal article supplement (PMC7140339; doi:10.1186/s12870-020-02353-z), 2020-04-08

# a ddH<sub>2</sub>OInfected vs ddH<sub>2</sub>OUninfected

Plant hormone signal transduction Gene ID Annotation

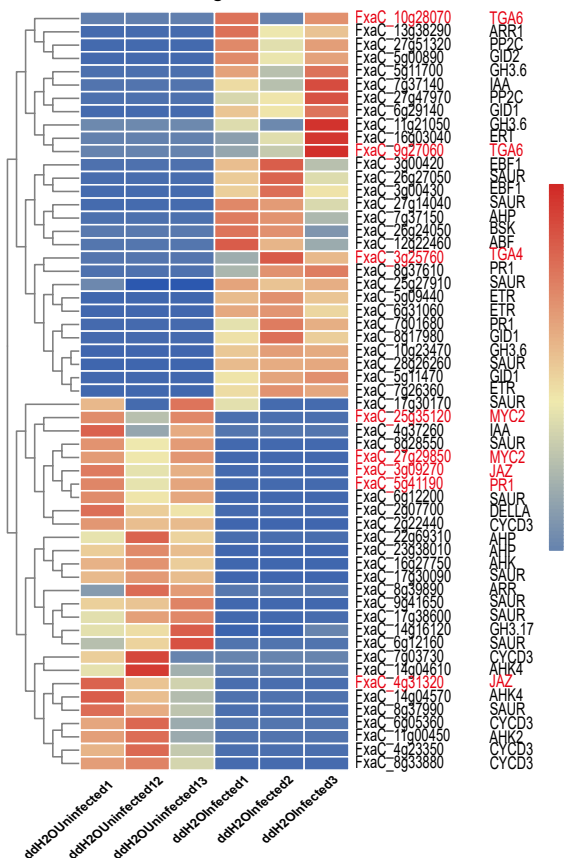

# b SAUninfected vs SAInfected

Plant hormone signal transduction Gene ID Annotation

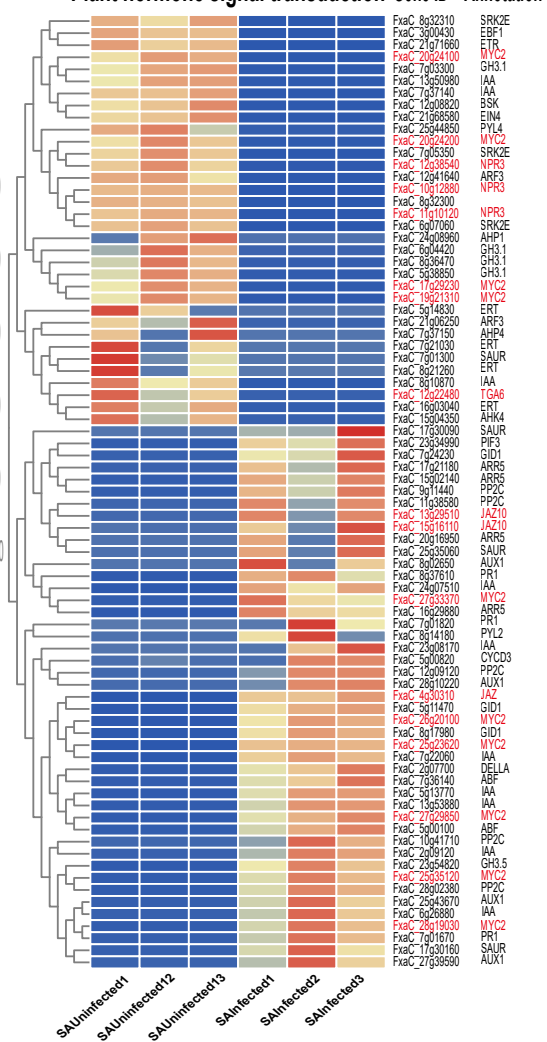

Supplement: 12870_2020_2353_MOESM5_ESM.pdf [file 12870_2020_2353_MOESM5_ESM.pdf]
